# Supplementary material
Source: PubMed Central journal article supplement (PMC3769706)
Supplement: NIHMS507799-supplement-1_si_001.pdf [file NIHMS507799-supplement-1_si_001.pdf]

# Sensitive, Site-Specific, and Stable Vibrational Probe of Local Protein Environments: 4-Azidomethyl-L-Phenylalanine

Christopher G. Bazewicz, Melanie T. Liskov, Kevin J. Hines, and Scott H. Brewer\*  
Franklin & Marshall College, Department of Chemistry, Lancaster, PA 17604-3003 USA

## Supporting Information

### *Sequence of wt-sfGFP.*

The sequence for wt-sfGFP is provided in Figure S1.

MVSKGEELFTGVVPILVELDGDVNGHKFSVRGEGEGDATNGKLT<sup>75</sup>LFICTTGKLPVPWPTLVTTLT<sup>134</sup>TYGVQCFSRYPDHMKR<sup>134</sup>HDFFKSAMPEGYVQERTISFKDDGTYKTRAEVKFE<sup>75</sup>GD<sup>134</sup>LVNRIELK<sup>75</sup>GIDFKEDGNILGHKLEYN<sup>75</sup>FN<sup>75</sup>SHNVYITADKQKNGIKANFKIRHNVEDG<sup>75</sup>SVQLADHYQ<sup>75</sup>QNTPIGDGPVLLPDNH<sup>75</sup>YLSTQSVLSKDPNEKRDHMLLEFVTAAGITHGMDELYKGS<sup>75</sup>HHHHHH

Figure S1. Amino acid sequence of wt-sfGFP with residues 75 and 134 in italics.

### *ESI-Q-TOF Mass Analysis.*

Incorporation of pN<sub>3</sub>CH<sub>2</sub>Phe or pN<sub>3</sub>Phe into sfGFP in response to the amber codon was verified by electrospray ionization quadrupole time-of-flight (ESI-Q-TOF) mass analysis (see Table S1). This analysis was performed on the same purified protein samples used for the FTIR measurements. ESI-Q-TOF mass analysis was performed at the Mass Spectrometry Facility at the University of Illinois Urbana-Champaign under the direction of Dr. Furong Sun. Prior to the analysis, the protein samples were desalted into a 20 mM ammonium acetate buffer (pH 7) using PD10 gel filtration columns, lyophilized, and resuspended in 1:1 H<sub>2</sub>O:CH<sub>3</sub>CN with 0.2% formic acid.

The mass difference between wt-sfGFP and sfGFP-75-pN<sub>3</sub>CH<sub>2</sub>Phe is indicative of the replacement of Y75 with pN<sub>3</sub>CH<sub>2</sub>Phe, and the mass difference between wt-sfGFP and sfGFP-134-pN<sub>3</sub>CH<sub>2</sub>Phe is indicative of the replacement of D134 with pN<sub>3</sub>CH<sub>2</sub>Phe, within the error of the measurement. Similarly, the mass difference between wt-sfGFP and sfGFP-75-pN<sub>3</sub>Phe is indicative of the replacement of Y75 with pN<sub>3</sub>Phe, and the mass difference between wt-sfGFP and sfGFP-134-pN<sub>3</sub>Phe is indicative of the replacement of D134 with pN<sub>3</sub>Phe, within the error of the measurement.

Table S1. ESI-Q-TOF observed molecular weights of protein constructs.

| Protein Construct                             | Observed Molecular Weight (g/mol) |
|-----------------------------------------------|-----------------------------------|
| wt-sfGFP                                      | 27829±1                           |
| sfGFP-75-pN <sub>3</sub> CH <sub>2</sub> Phe  | 27868±1                           |
| sfGFP-75-pN <sub>3</sub> Phe                  | 27854±1                           |
| sfGFP-134-pN <sub>3</sub> CH <sub>2</sub> Phe | 27917±1                           |
| sfGFP-134-pN <sub>3</sub> Phe                 | 27902±1                           |

*Equilibrium UV/Vis Absorbance Measurements.*

The equilibrium UV/Vis absorbance spectra were recorded on a PerkinElmer Lambda 25 UV/Vis spectrometer using a 1 cm quartz sample holder. The spectra were recorded at room temperature with 1 nm increments and a scan speed of 240 nm/min. The UV/Vis absorbance spectra for pN<sub>3</sub>Phe and pN<sub>3</sub>CH<sub>2</sub>Phe dissolved in water are shown in Figure S2 illustrating the significant decrease in absorbance at 254 nm for pN<sub>3</sub>CH<sub>2</sub>Phe compared to pN<sub>3</sub>Phe.

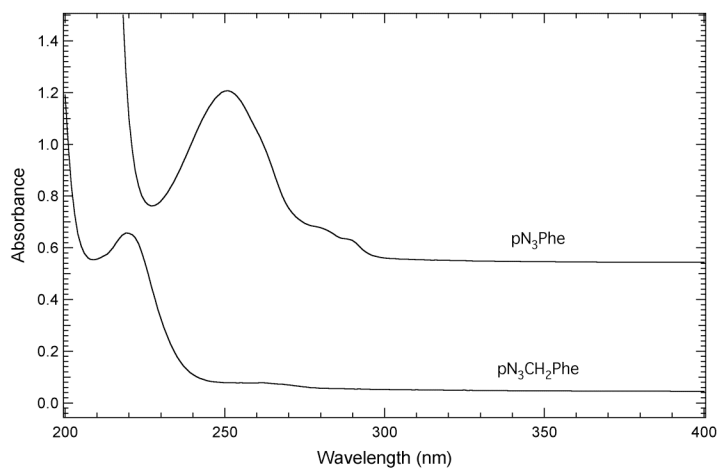

Figure S2. The UV/Vis absorbance spectra of pN<sub>3</sub>Phe and pN<sub>3</sub>CH<sub>2</sub>Phe dissolved in water at a concentration of 50 μM.
